# Supplementary material for: Dynamic thin film mediated slicing of boron nitride nanotubes
Source: Royal Society of Chemistry journal article supplement (doi:10.1039/c9na00481e), 2019-01-01
Supplement: c9na00481e1.pdf [file c9na00481e1.pdf]

## Dynamic thin film mediated slicing of boron nitride nanotubes

Ahmed Hussein Mohammed Al-antaki<sup>a,b</sup>, Warren Lawrance<sup>c</sup>, Colin L. Raston<sup>\*a</sup>

- a- Flinders Institute for Nanoscale Science and Technology, College of Science and Engineering, Flinders University, Adelaide, SA 5042, Australia.
- b- Department of Chemistry, Faculty of Sciences, Kufa University, Kufa, Najaf, Iraq.
- c- College of Science and Engineering, Flinders University, Adelaide, SA 5042.

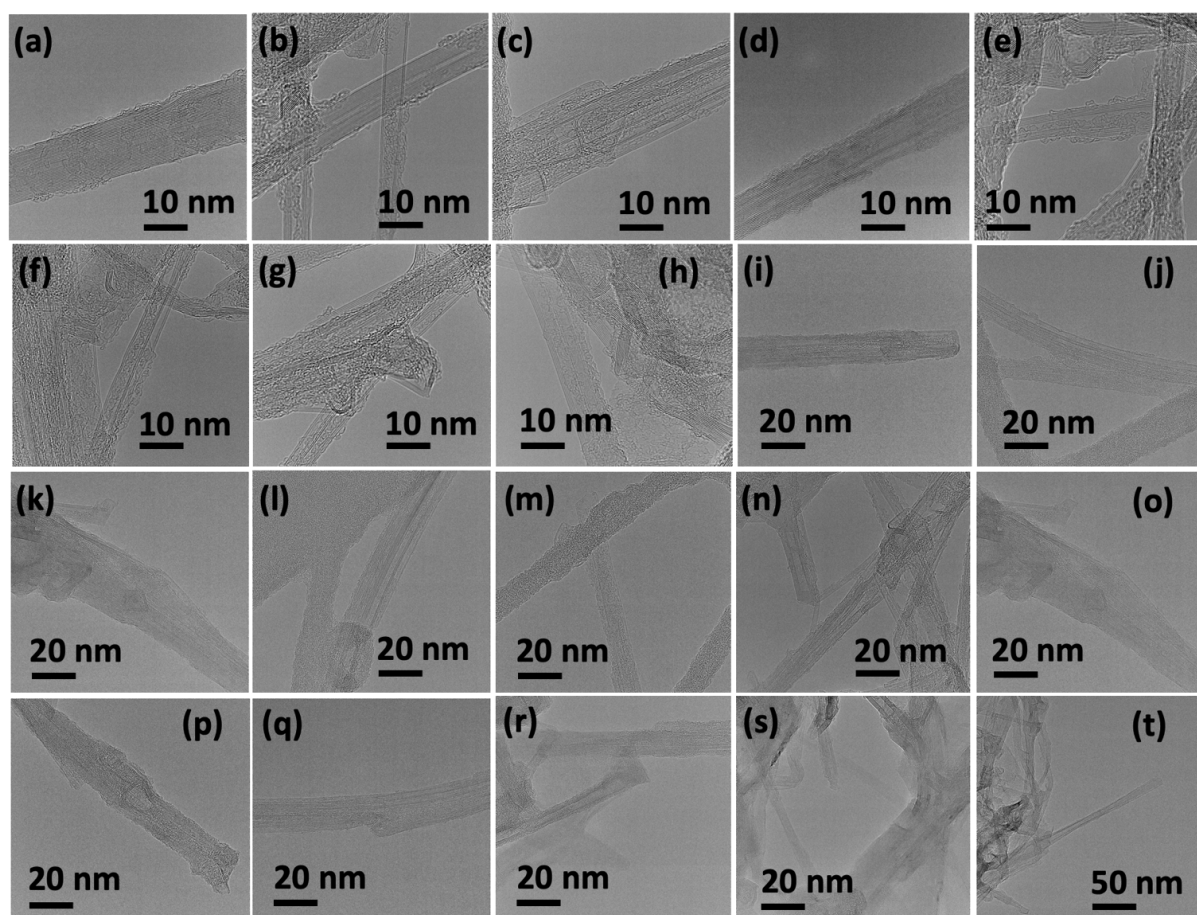

**Figure S 1.** HRTEM images of drop cast BNNTs after purification the as received material, after 2.5 h at 60°C followed by 3 h stirring in IPA and water (1:3) at 100°C.

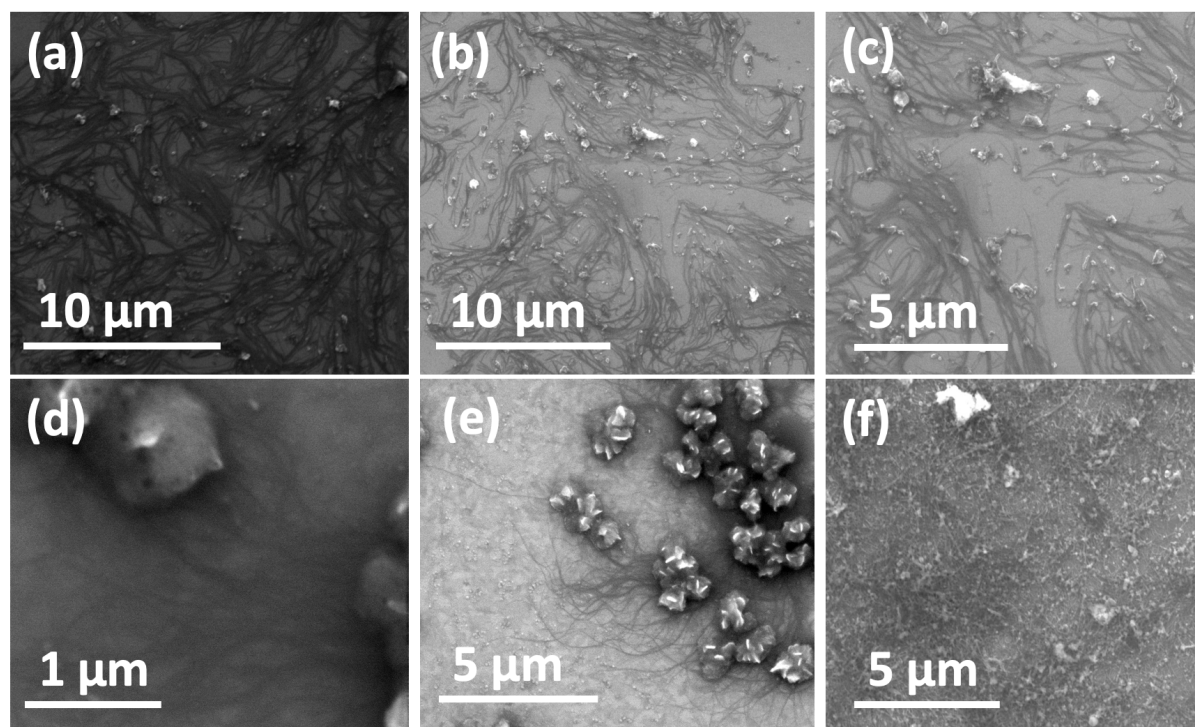

**Figure S 2.** SEM images for drop cast of BNNTs (0.1 mg/mL) in toluene and water (1:1) rotational speed 7.5k rpm, confined mode for 1 h while irradiated with a 280 mJ NIR pulse laser. (a-c) pH of water 9. (d, e) pH of water 10. (f) pH of water 5.

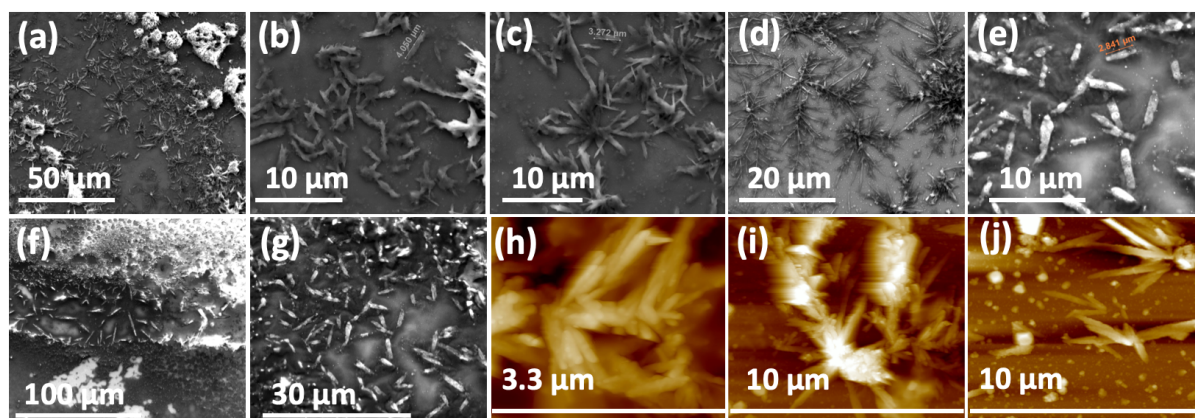

**Figure S 3.** Drop cast BNNTs (0.1 mg/mL) in toluene and THF (1:1), flow rate 0.1 mL/min, flow rate of water at pH= 9 0.15 mL/min, rotational speed 7.5k rpm, 280 mJ NIR, 45° tilt angle. (a-d) SEM images for aqueous phase. (e-g) SEM images for evaporated organic phase. (h-j) AFM images of the evaporated aqueous phase.

## First method :-

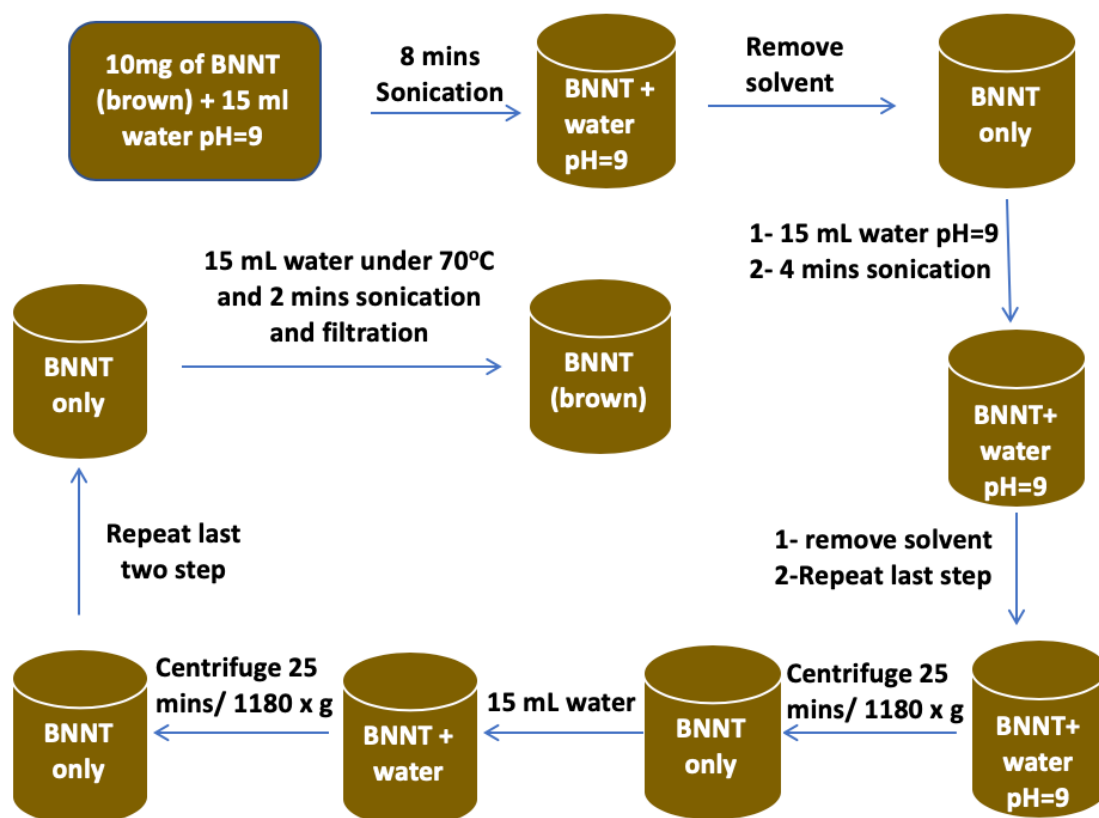

Figure S 4. First step used to remove the impurities in as received BNNTs.

## second method :-

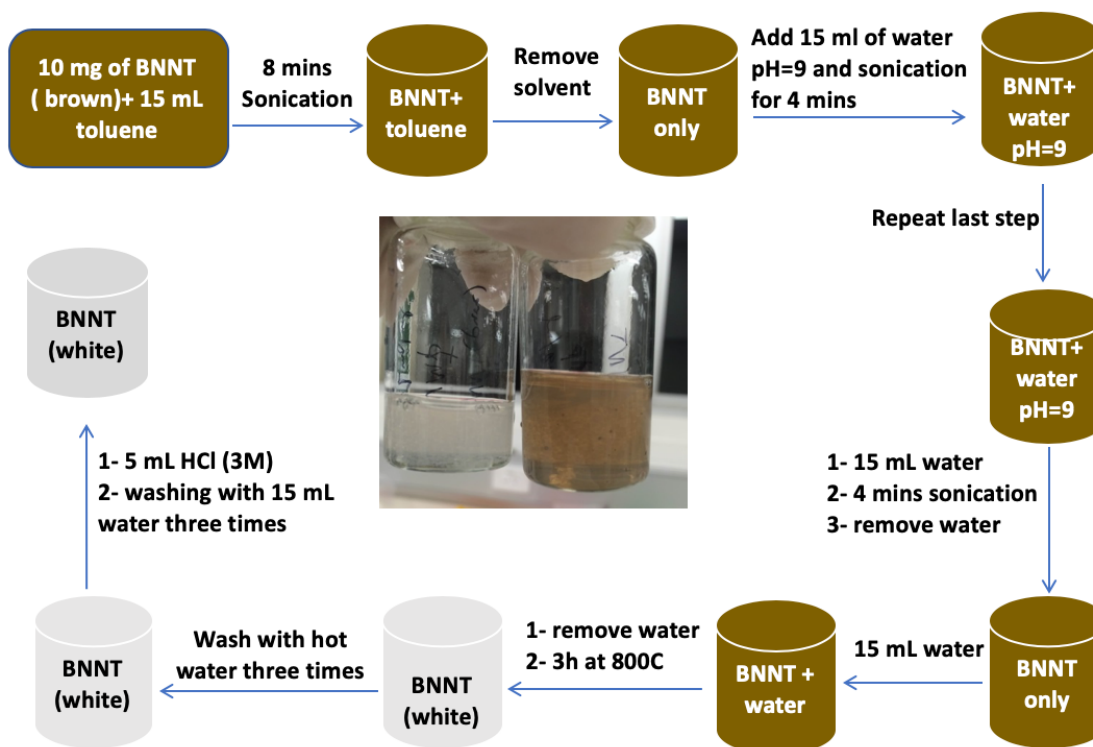

Figure S 5. Second processing step 2 to purify as received BNNTs.

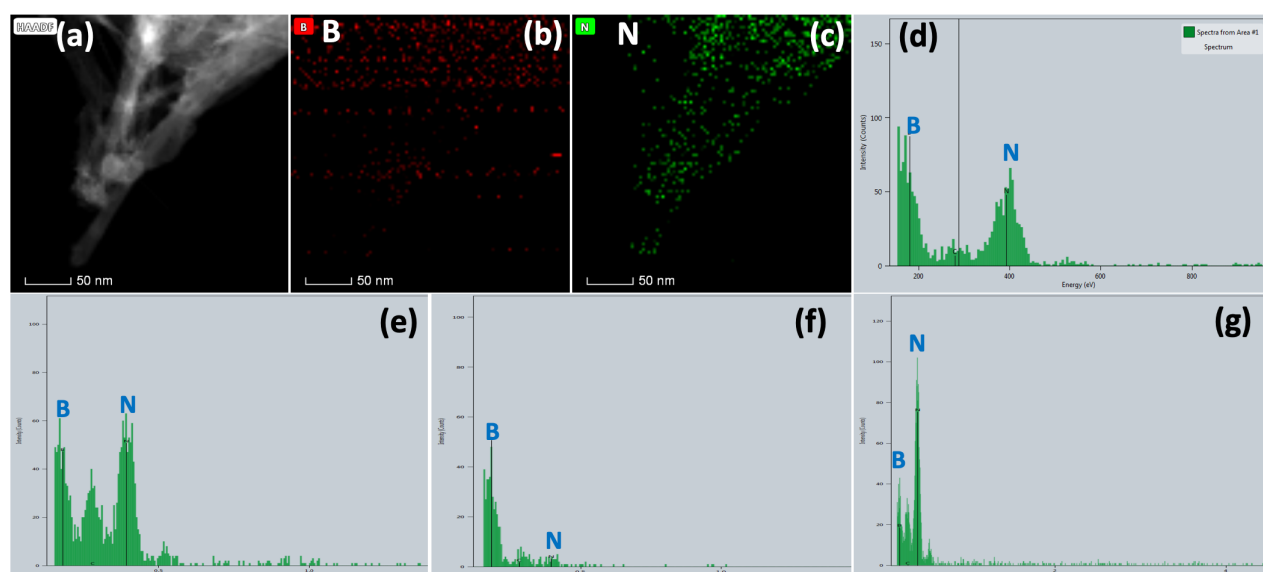

**Figure S 6.** Purified BNNTs after 2.5 h at 60°C followed by 3 h stirring in IPA and water (1:3) at 100°C. (a-c) EDS mapping of purified BNNTs associated with HRTEM. (d) EDS spectrum. (e-g) EDS using HRTEM at different locations.

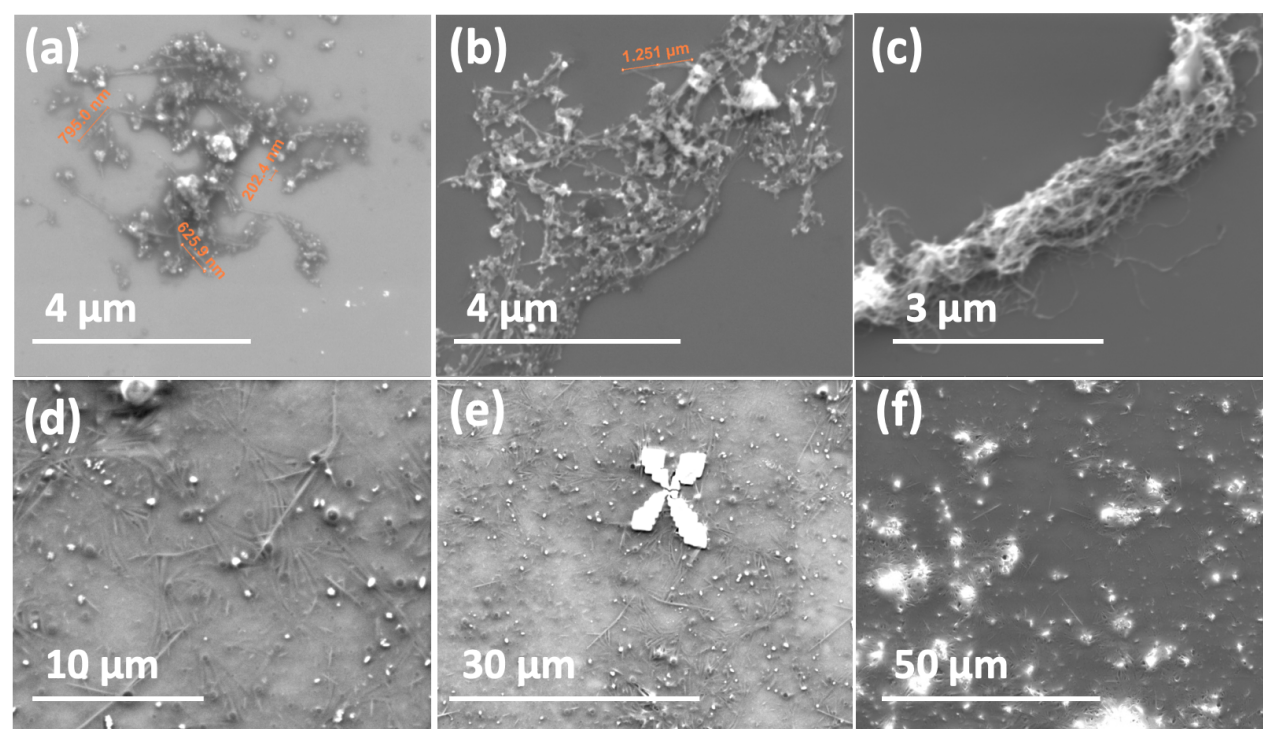

**Figure S 7.** SEM images of drop cast BNNTs (0.1 mg/mL) in IPA and water (1:1), rotational speed 7.5k rpm, flow rate 0.1 mL/min, 45° tilt angle. (a-c) Green laser processing (532 nm), 260 mJ. (d-f) NIR laser (1062 nm), 600 mJ.



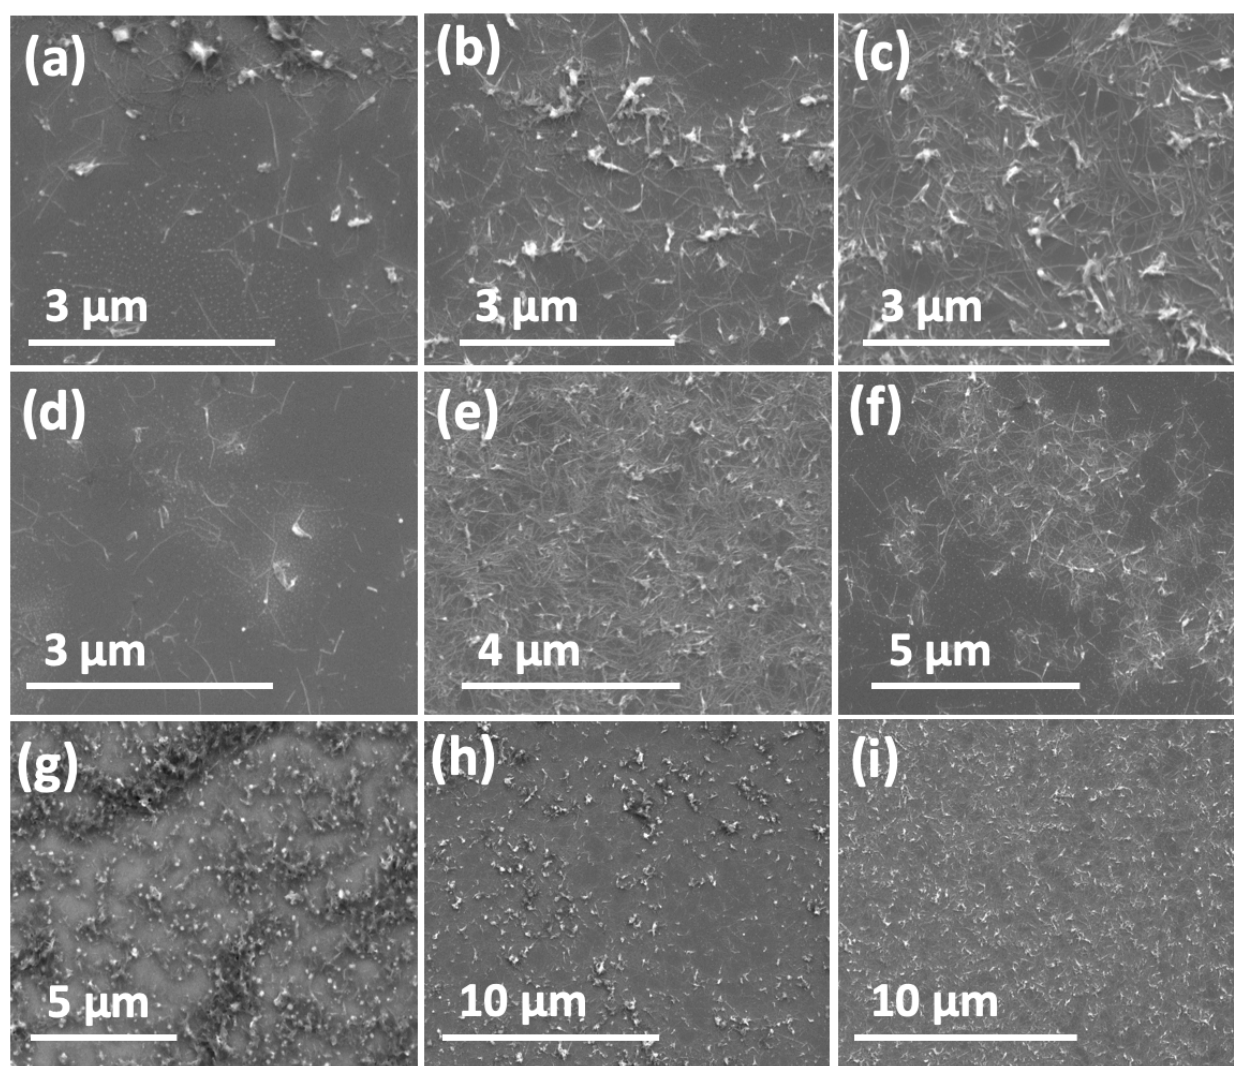

**Figure S 8.** SEM images of drop cast BNNTs in IPA and water (1:1) after processing in a VFD with 400 mJ NIR laser irradiation, concentration 0.1 mg/mL, flow rate 0.45 mL/min, rotational speed 8.5k rpm and 45° tilt angle.

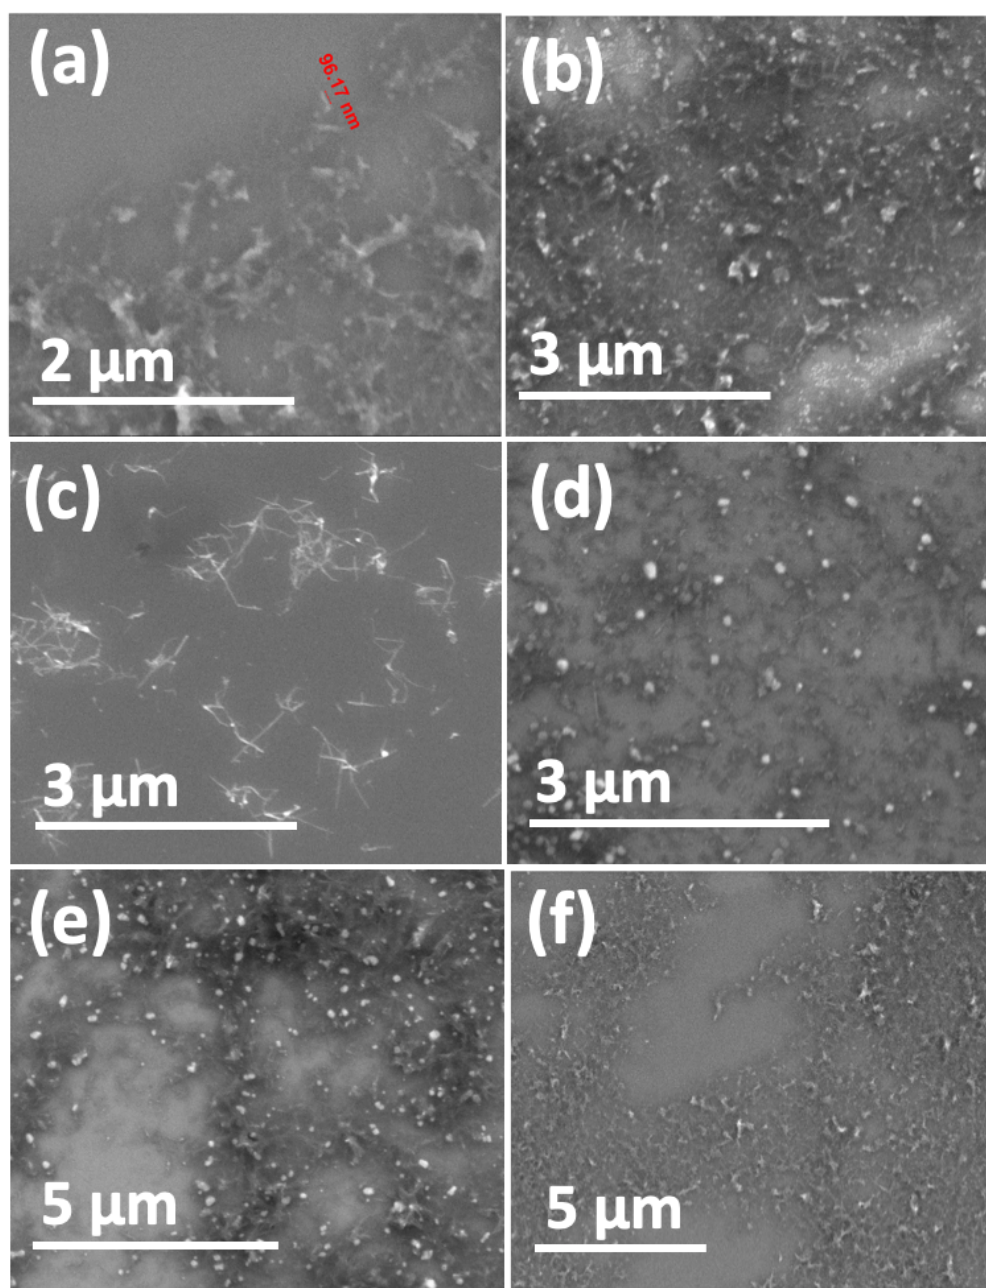

**Figure S 9.** SEM images for drop cast BNNTs prepared in IPA and water (1:1) after processing in a VFD while irradiated with 600 mJ NIR laser, concentration 0.1 mg/mL, flow rate 0.45 mL/min, rotational speed 8.5k rpm and 45° tilt angle.

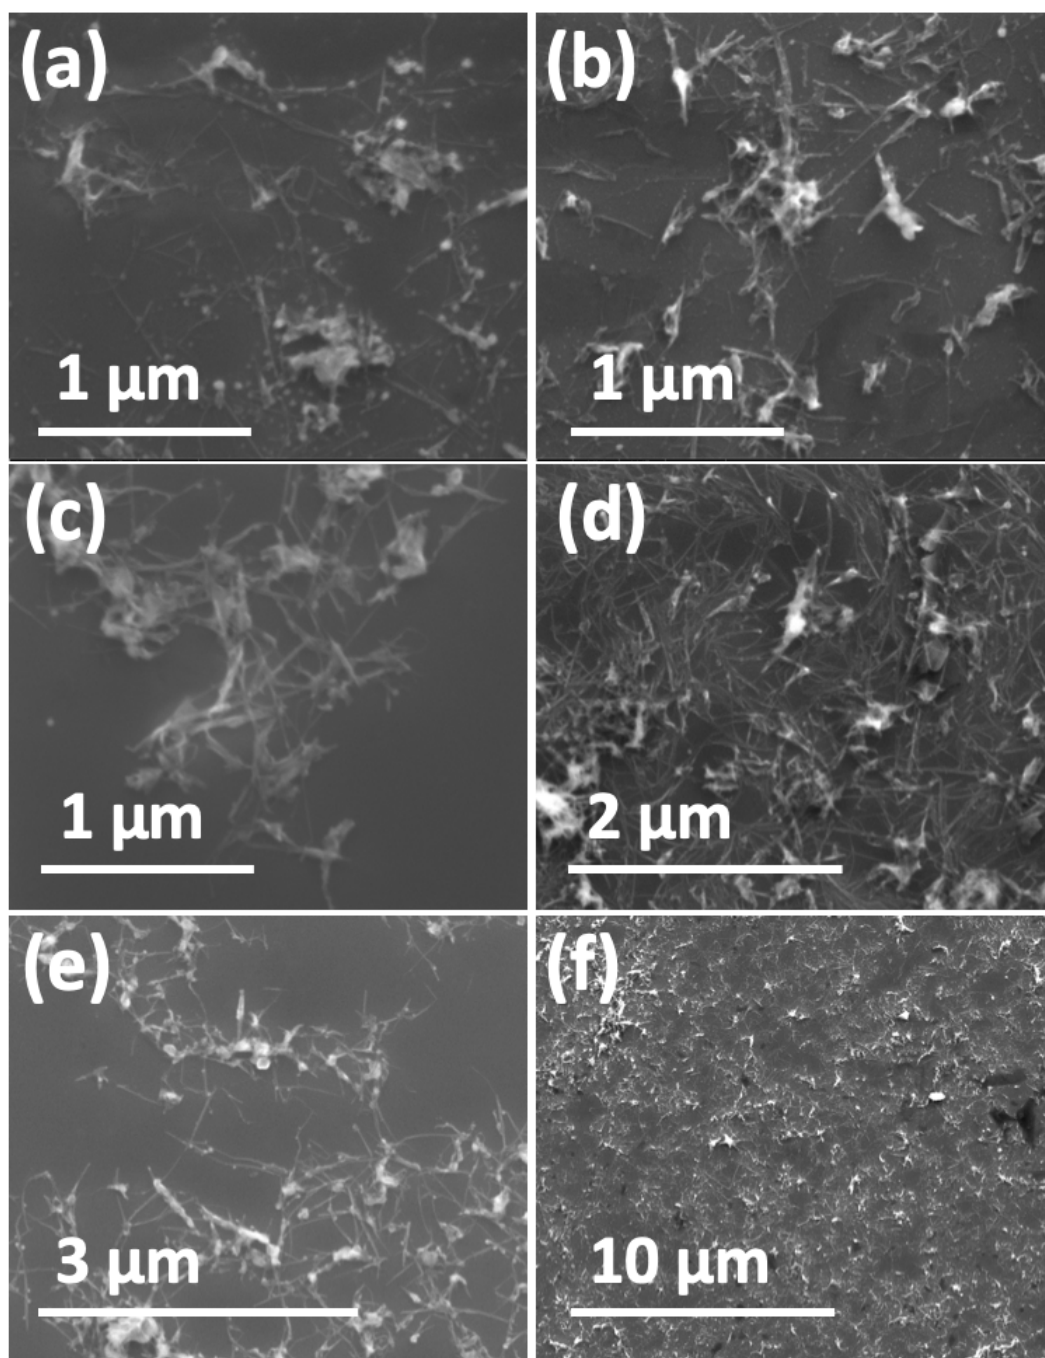

**Figure S 10.** SEM images of drop cast sliced BNNTs in IPA and water (1:1) after processing in the VFD with a pulsed laser operating at 1064 nm and 250 mJ, concentration 0.1 mg/mL, flow rate 0.45 mL/min, rotational speed 8.5k rpm and 45° tilt angle.

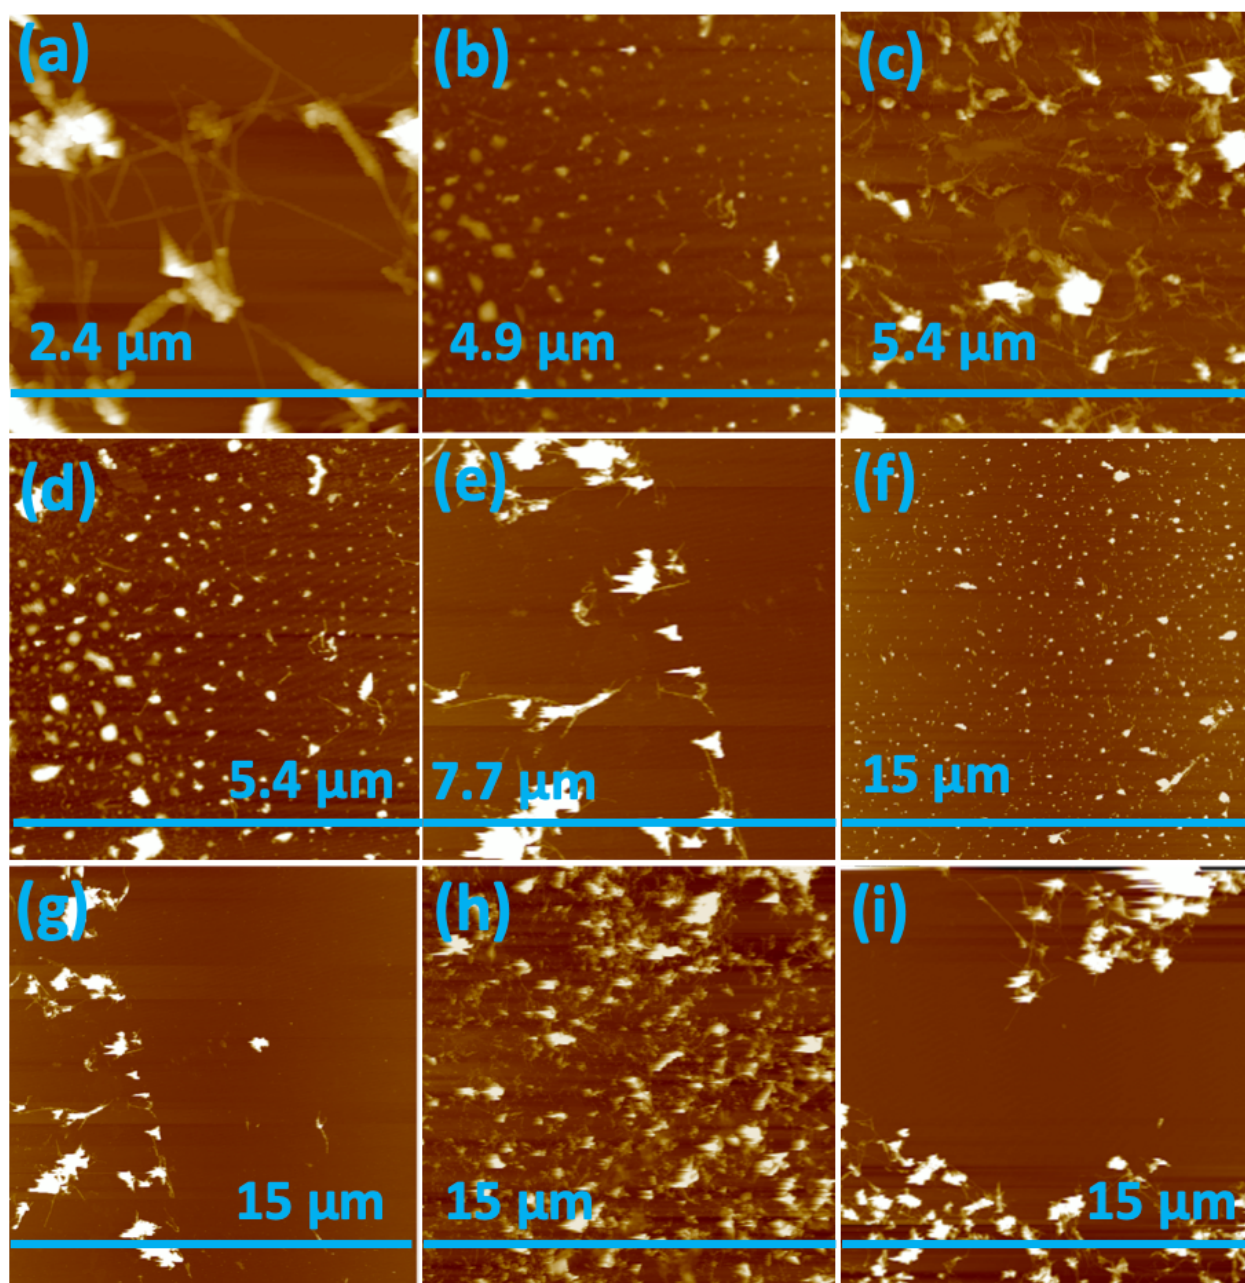

**Figure S 11.** AFM images for drop cast sliced BNNTs prepared in IPA and water (1:1) after processing in the VFD with a pulsed laser operating at 1064 nm and 250 mJ, concentration 0.1 mg/mL, flow rate 0.45 mL/min, rotational speed 8.5k rpm and 45° tilt angle.



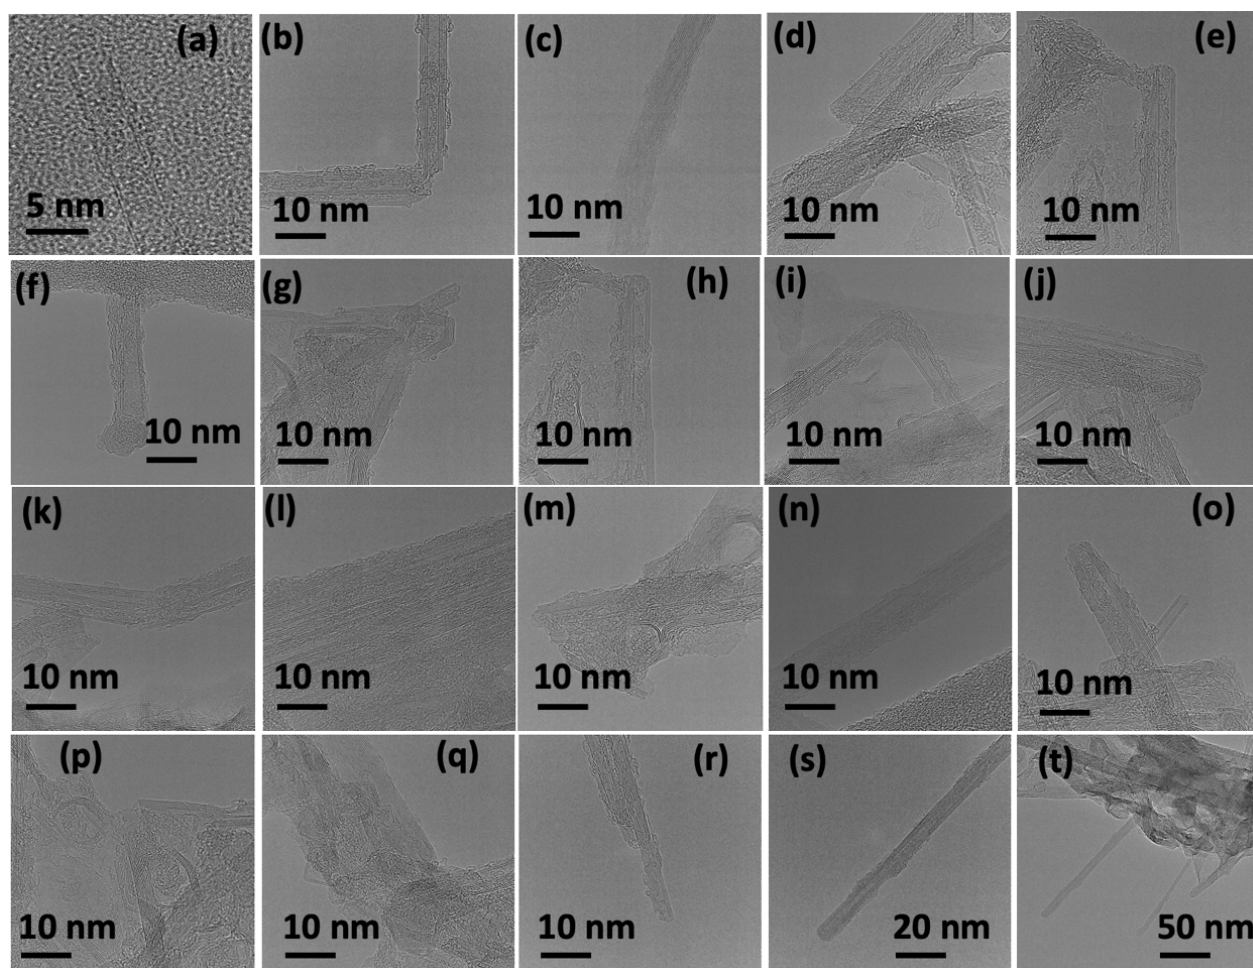

**Figure S 12.** HRTEM images of drop cast sliced BNNTs in IPA and water (1:1) after processing in the VFD with a pulsed laser operating at 1064 nm and 250 mJ, concentration 0.1 mg/mL, flow rate 0.45 mL/min, rotational speed 8.5k rpm and 45° tilt angle.

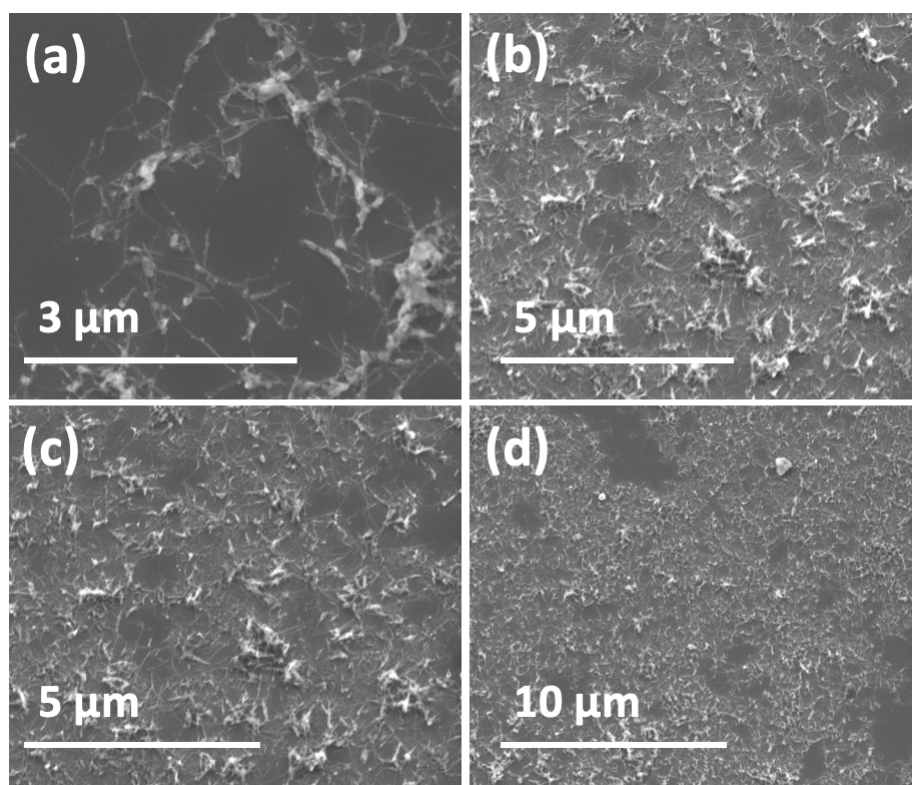

**Figure S 13.** SEM images for drop cast of BNNTs in IPA and water (1:1) after processing in a VFD, concentration 0.1 mg/mL, flow rate 0.45 mL/min, rotational speed 8.5k rpm with 45° tilt angle.

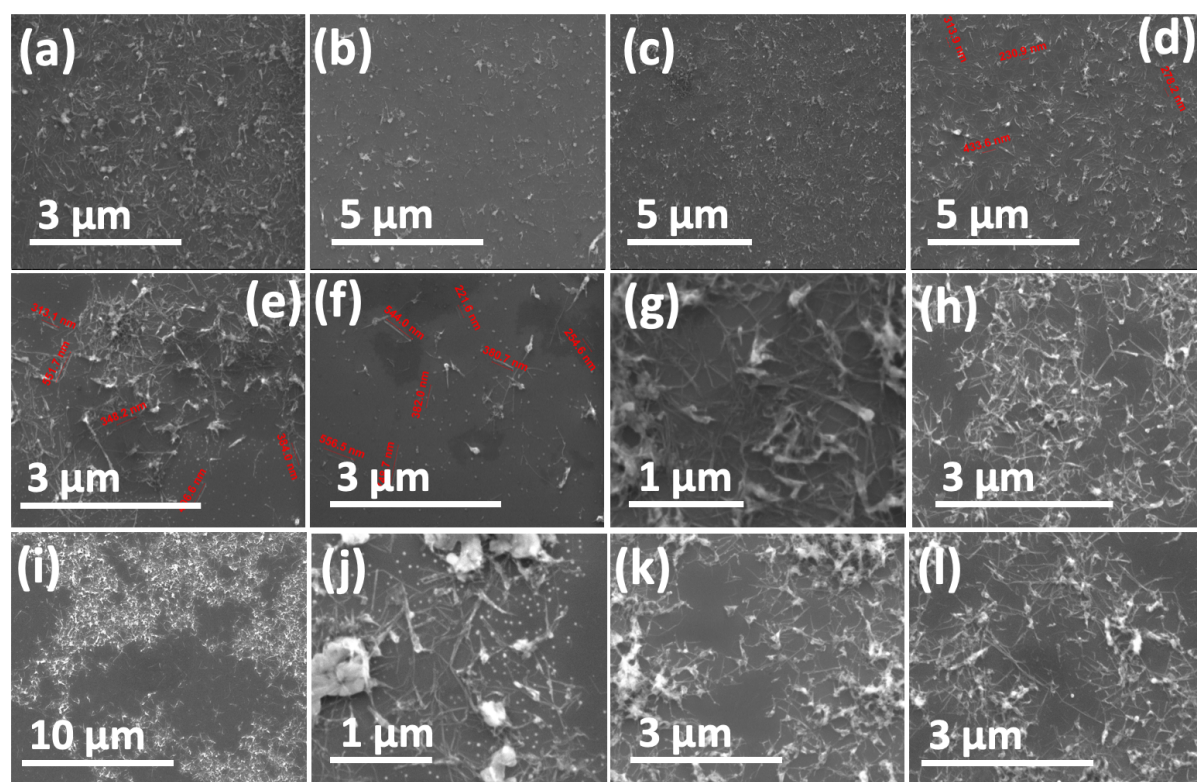

**Figure S 14.** SEM images for drop cast of BNNTs (0.1 mg/mL) after processing in a VFD while irradiated with a 250 mJ NIR laser, flow rate 0.45 mL/min and 45° tilt angle. (a-c) DMF as the solvent, rotational speed 6k rpm. (d-f) DMF as the solvent, rotation speed 8.5k rpm. (g-i) DMF and water (1:1) as the solvent, rotational speed 8.5k rpm. (j-l) Water as the solvent, rotational speed 8.5k rpm.

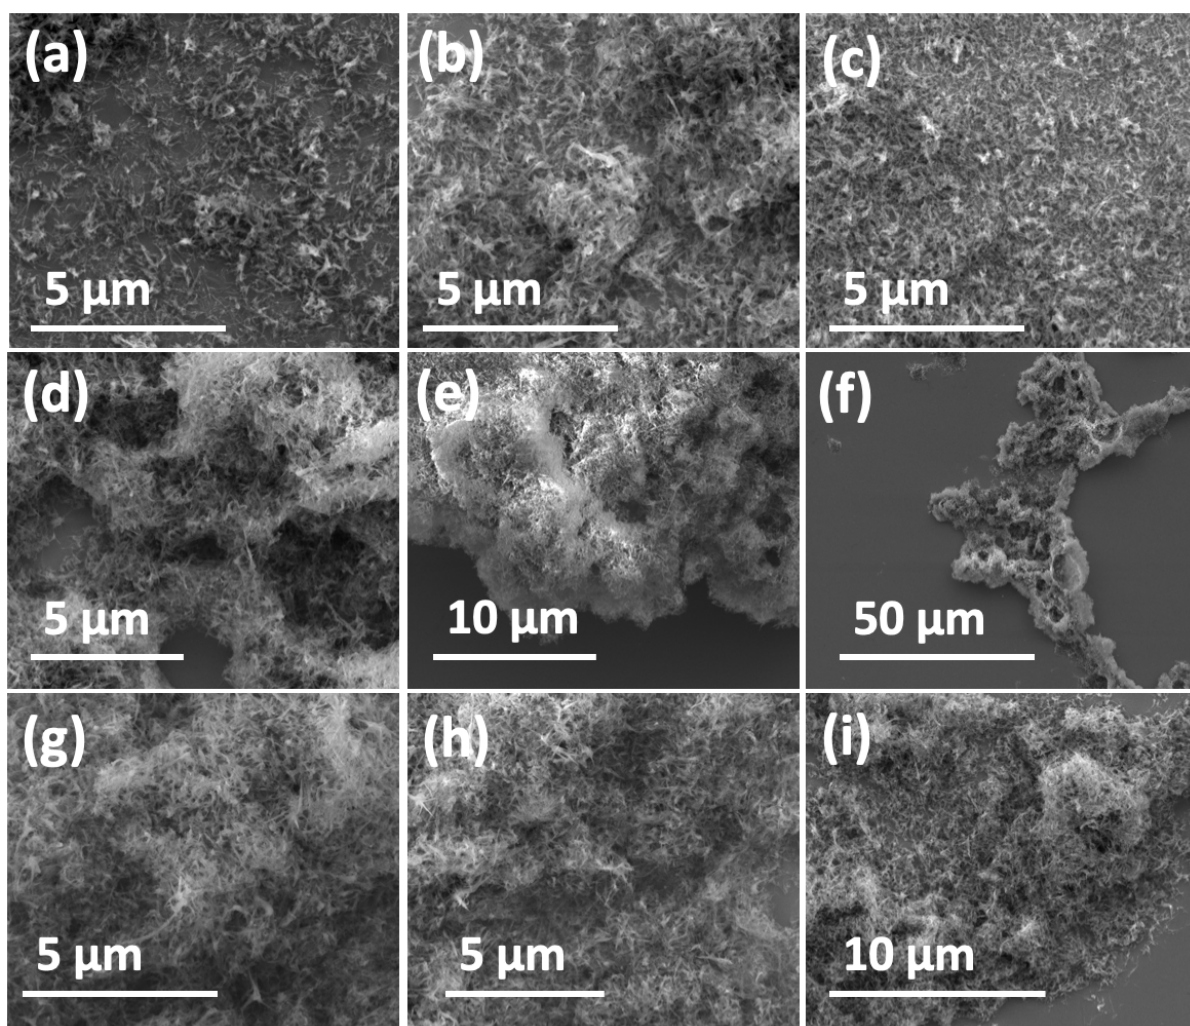

**Figure S 15.** SEM images for drop cast of BNNT (0.2 mg/mL) in toluene and water (1:1) after sonication for 30 mins, with 1 mL of the milky suspension used in the confined mode of operation of the VFD for 15 mins, 45° tilt angle. (a-c) Rotational speed 4k rpm. (d-f) Rotational speed 6k rpm. (g-i) Rotational speed 8k rpm.



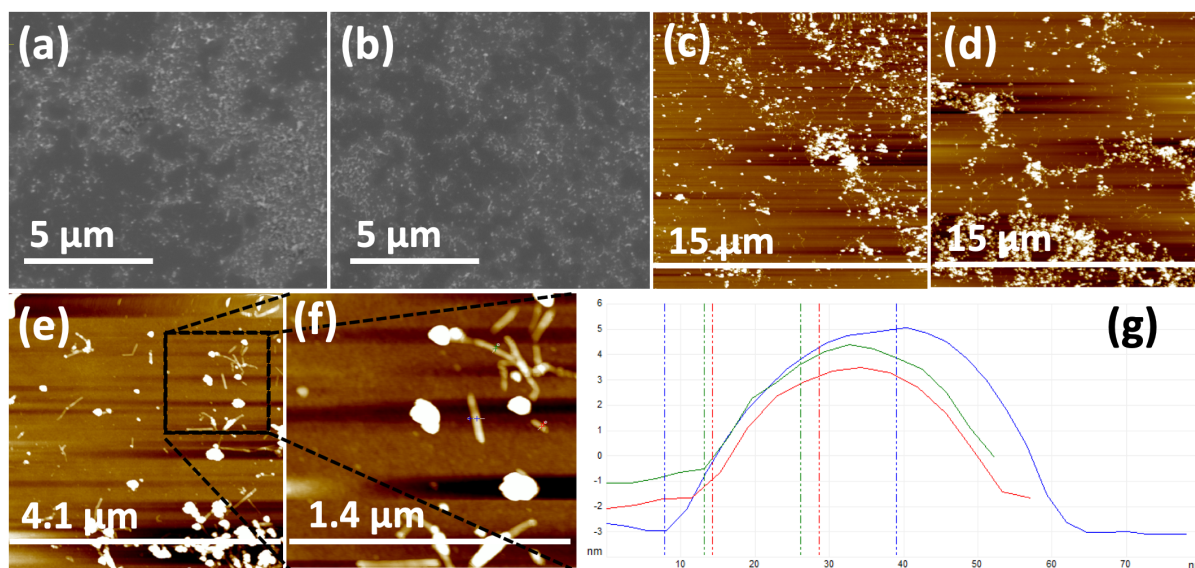

**Figure S 16.** Drop cast of BNNTs in water (0.1 mg/mL) after VFD processing, flow rate 0.3 mL/min, rotational speed 7.5k rpm and 600 mJ NIR laser, with the tube at 45° tilt angle. (a, b) SEM images. (c-f) AFM images. (g) Height of three tubes measured from AFM images.

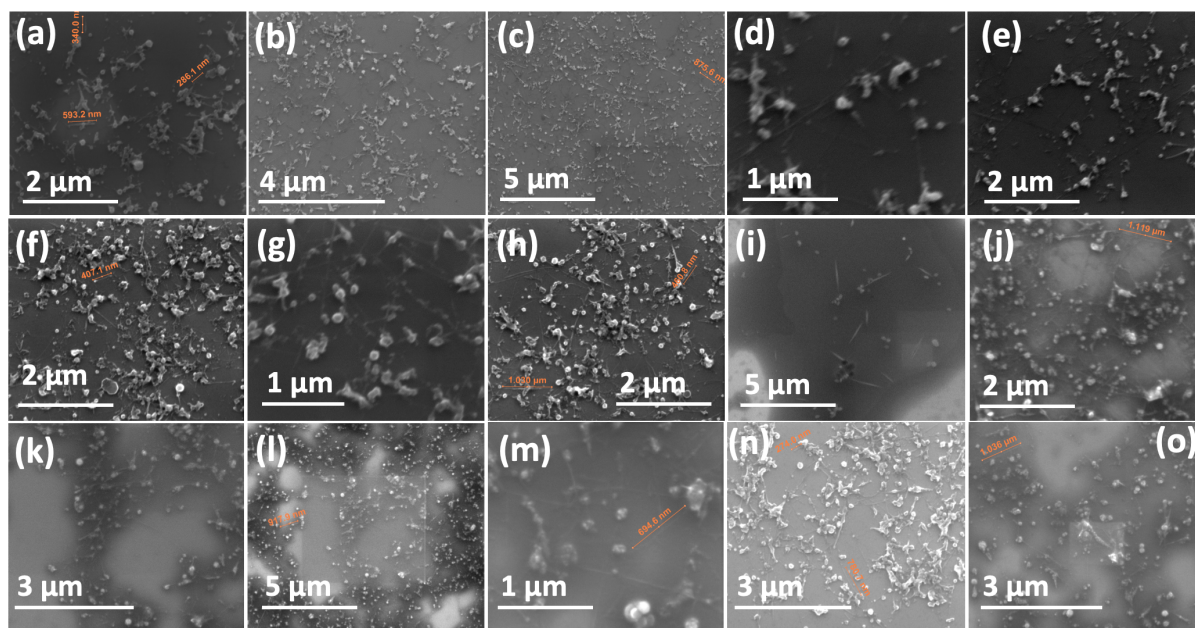

**Figure S 17.** SEM images for drop cast BNNTs (0.1 mg/mL) in NMP, rotational speed 7.5k rpm, confined mode, 45° tilt angle. (a-c) 10 min, 280 mJ NIR laser irradiation. (d-f) 30 mins, 280 mJ NIR laser irradiation. (g-i) 1 h, 280 mJ NIR laser irradiation. (j-l) 30 mins, 400 mJ NIR laser irradiation. (m-o) 1 h, 400 mJ NIR laser irradiation.
